# Supplementary material for: Predicting early-onset COPD risk in adults aged 20–50 using electronic health records and machine learning
Source: PeerJ. 2024 Feb 23;12:e16950. doi: 10.7717/peerj.16950 (PMC10896079; doi:10.7717/peerj.16950)
Supplement: Supplemental Information 2 — Different indicator values are introduced in each sheet, which are listed as model types and characteristics of behavior use. [file peerj-12-16950-s002.xlsx]

## Sheet: Sensitivity
	ANN	SVM-Linear	SVM-Radial	KNN	RandomForest	AdaBoost	Bayes-glm	C5.0	xgBoost	SVM-Poly
SNP	0.52809	0.516854	0.52809	0.522472	0.539326	0.522472	0.516854	0.516854	0.516854	0.516854
Others	0.730337	0.735955	0.758427	0.61236	0.747191	0.741573	0.764045	0.724719	0.786517	0.775281
Others+blood	0.702247	0.713483	0.741573	0.483146	0.758427	0.752809	0.713483	0.719101	0.747191	0.792135
Others+blood+SNP	0.719101	0.685393	0.735955	0.483146	0.747191	0.724719	0.702247	0.747191	0.741573	0.752809

## Sheet: Specificity
Specificity	ANN	SVM-Linear	SVM-Radial	KNN	RandomForest	AdaBoost	Bayes-glm	C5.0	xgBoost	SVM-Poly
SNP	0.764045	0.786517	0.741573	0.786517	0.786517	0.741573	0.730337	0.797753	0.730337	0.741573
Others	0.820225	0.820225	0.797753	0.730337	0.831461	0.808989	0.820225	0.674157	0.853933	0.808989
Others+blood	0.730337	0.820225	0.786517	0.58427	0.853933	0.820225	0.797753	0.662921	0.820225	0.820225
Others+blood+SNP	0.764045	0.775281	0.797753	0.58427	0.842697	0.786517	0.808989	0.786517	0.808989	0.831461

## Sheet: Acc
	ANN	SVM-Linear	SVM-Radial	KNN	RandomForest	AdaBoost	Bayes-glm	C5.0	xgBoost	SVM-Poly
SNP	0.52809	0.516854	0.52809	0.522472	0.539326	0.522472	0.516854	0.516854	0.516854	0.516854
Others	0.730337	0.735955	0.758427	0.61236	0.747191	0.741573	0.764045	0.724719	0.786517	0.775281
Others+blood	0.702247	0.713483	0.741573	0.483146	0.758427	0.752809	0.713483	0.719101	0.747191	0.792135
Others+blood+SNP	0.719101	0.685393	0.735955	0.483146	0.747191	0.724719	0.702247	0.747191	0.741573	0.752809

## Sheet: F1
	ANN	SVM-Linear	SVM-Radial	KNN	RandomForest	AdaBoost	Bayes-glm	C5.0	xgBoost	SVM-Poly
SNP	0.382353	0.338462	0.4	0.351145	0.38806	0.388489	0.385714	0.328125	0.385714	0.376812
Others	0.703704	0.711656	0.748538	0.56051	0.723926	0.722892	0.75	0.737968	0.771084	0.767442
Others+blood	0.693642	0.679245	0.729412	0.425	0.732919	0.73494	0.687117	0.734043	0.727273	0.786127
Others+blood+SNP	0.705882	0.654321	0.718563	0.425	0.720497	0.706587	0.666667	0.736842	0.722892	0.731707
